# Supplementary material for: Multi-omics integration in Esophageal Adenocarcinoma reveals therapeutic targets and EAC-specific regulation of protein abundances
Source: bioRxiv or medRxiv preprint supplement (doi:10.1101/2022.11.24.22281691), 2022-11-29
Supplement: Supplementary file [file media-1.pdf]

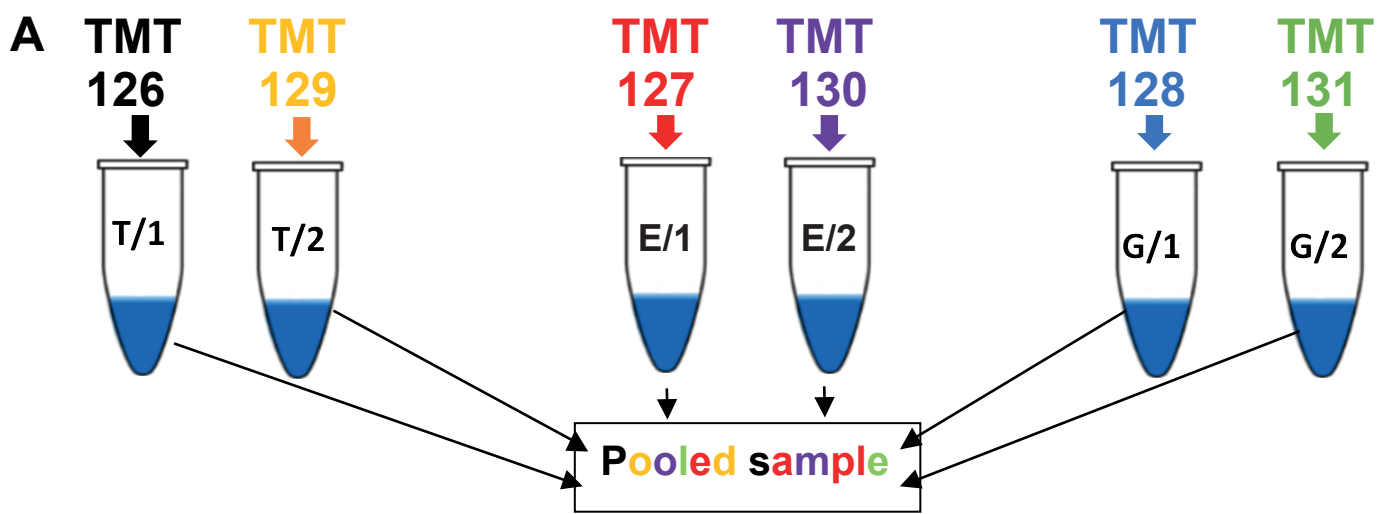

**B**

| Patient    | TMT channel G/replicate |            | TMT channel E/replicate |            | TMT channel T/replicate |            | .... pool |
|------------|-------------------------|------------|-------------------------|------------|-------------------------|------------|-----------|
|            | G/1                     | G/2        | E/1                     | E/2        | T/1                     | T/2        |           |
| <u>50</u>  | 126<br>G/1              | 127<br>G/2 | 128<br>E/1              | 129<br>E/2 | 130<br>T/1              | 131<br>T/2 | .... pool |
| <u>67</u>  | 126<br>G/1              | 127<br>G/2 | 128<br>E/1              | 129<br>E/2 | 130<br>T/1              | 131<br>T/2 | .... pool |
| <u>92</u>  | 126<br>G/1              | 127<br>G/2 | 128<br>E/1              | 129<br>E/2 | 130<br>T/1              | 131<br>T/2 | .... pool |
| <u>105</u> | 126<br>G/1              | 127<br>G/2 | 128<br>E/1              | 129<br>E/2 | 130<br>T/1              | 131<br>T/2 | .... pool |
| <u>117</u> | 126<br>G/1              | 127<br>G/2 | 128<br>E/1              | 129<br>E/2 | 130<br>T/1              | 131<br>T/2 | .... pool |
| <u>131</u> | 126<br>G/1              | 127<br>G/2 | 128<br>E/1              | 129<br>E/2 | 130<br>T/1              | 131<br>T/2 | .... pool |

RP pre-fractionation

**C**

| Patient    | TMT channel G/replicate | TMT channel E/replicate | TMT channel T/replicate | .... pool |
|------------|-------------------------|-------------------------|-------------------------|-----------|
|            | G/1                     | E/1                     | T/1                     |           |
| <u>125</u> | 126<br>G/1              | -                       | 127N<br>T/1             | .... pool |
| <u>137</u> | 128C<br>G/1             | 127C<br>E/1             | 128N<br>T/1             |           |
| <u>59</u>  | 130N<br>G/1             | 129N<br>E/1             | 129C<br>T/1             |           |
| <u>47</u>  | -                       | 130C<br>E/1             | 131<br>T/1              |           |

RP pre-fractionation

**D**

| Patient   | TMT channel G/replicate | TMT channel E/replicate | TMT channel T/replicate | .... pool |
|-----------|-------------------------|-------------------------|-------------------------|-----------|
|           | G/1                     | E/1                     | T/1                     |           |
| <u>70</u> | 126<br>G/1              | 127N<br>E/1             | 127C<br>T/1             | .... pool |
| <u>88</u> | 128N<br>G/1             | 128C<br>E/1             | 129N<br>T/1             |           |

RP pre-fractionation

**E**

| Patient    | TMT channel G/replicate | TMT channel E/replicate | TMT channel T/replicate | .... pool |
|------------|-------------------------|-------------------------|-------------------------|-----------|
|            | G/1                     | E/1                     | T/1                     |           |
| <u>62</u>  | 126<br>G/1              | 127N<br>E/1             | 127C<br>T/1             | .... pool |
| <u>64</u>  | 128N<br>G/1             | 128C<br>E/1             | 129N<br>T/1             |           |
| <u>129</u> | 129C<br>G/1             | 130N<br>E/1             | -                       |           |

RP pre-fractionation

**F**

| Patient   | TMT channel G/replicate |            | TMT channel E/replicate |            | TMT channel T/replicate |            | .... pool |
|-----------|-------------------------|------------|-------------------------|------------|-------------------------|------------|-----------|
|           | G/1                     | G/2        | E/1                     | E/2        | T/1                     | T/2        |           |
| <u>77</u> | 128<br>G/1              | 131<br>G/2 | 127<br>E/1              | 130<br>E/2 | 126<br>T/1              | 129<br>T/2 | .... pool |

RP pre-fractionation
