# Supplementary material for: Multi-omics integration in Esophageal Adenocarcinoma reveals therapeutic targets and EAC-specific regulation of protein abundances
Source: bioRxiv or medRxiv preprint supplement (doi:10.1101/2022.11.24.22281691), 2022-11-29

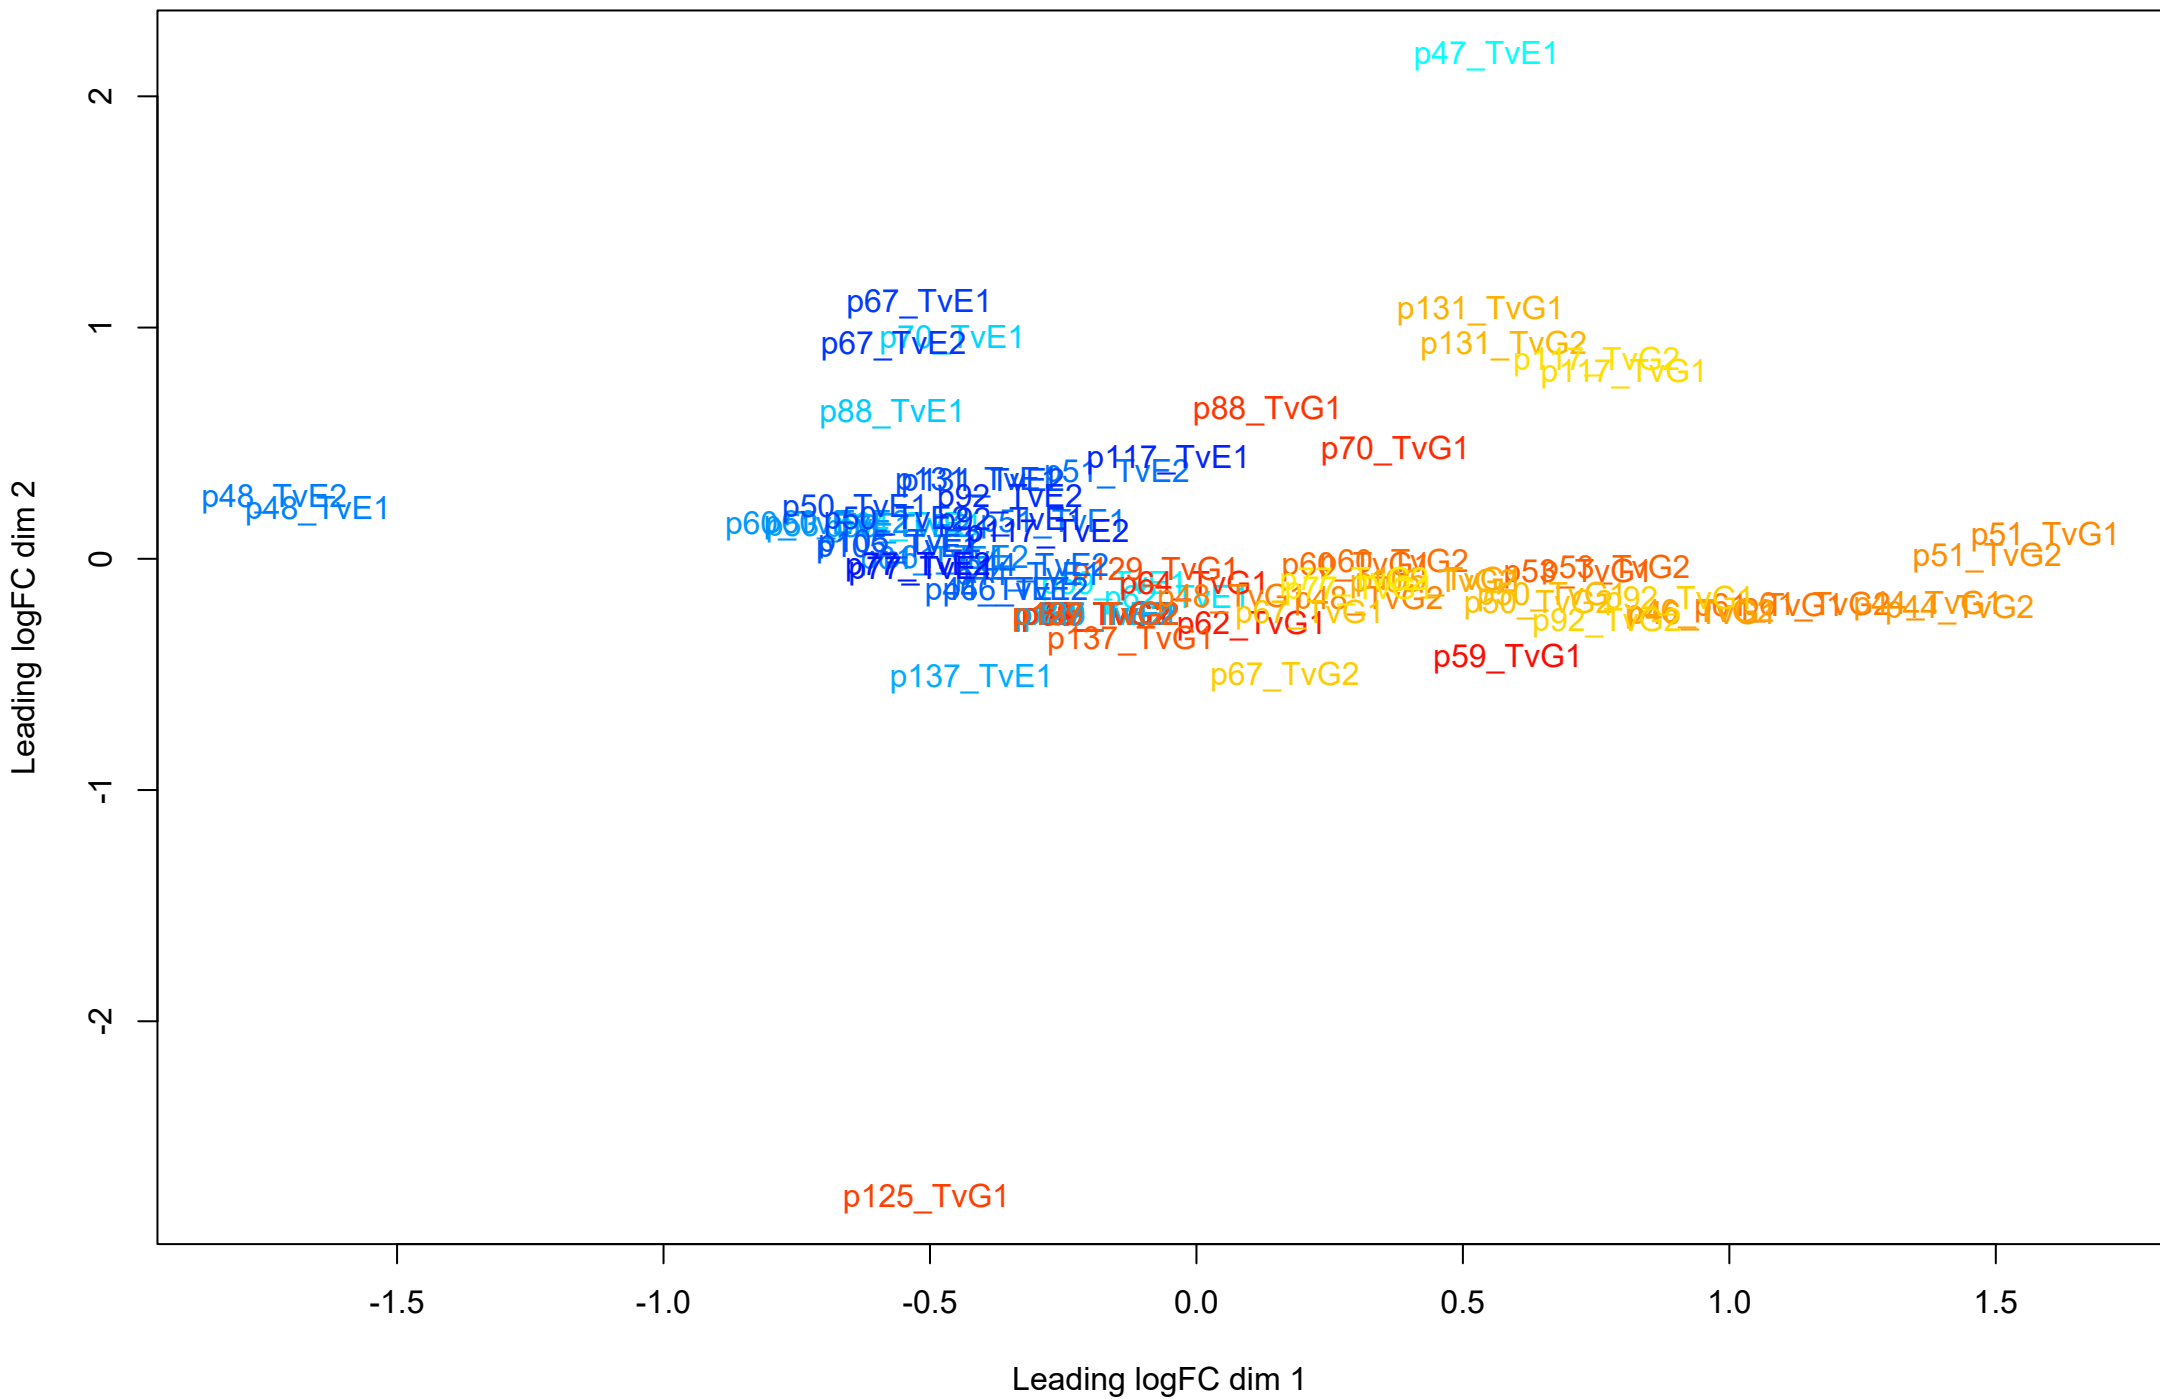

Supplement: Supplementary file [file media-3.pdf]
