# Supplementary material for: Multi-omics integration in Esophageal Adenocarcinoma reveals therapeutic targets and EAC-specific regulation of protein abundances
Source: bioRxiv or medRxiv preprint supplement (doi:10.1101/2022.11.24.22281691), 2022-11-29

Mutant allele frequencies (% of 454 patients)

3 %  
2 %  
1 %  
0 %

ACTG1 AGMAT AKR1C4 B2M CENPE CHFR EPHB2 HIGD2A HMGA1 OLFM4 PTBP2 RHNO1 SLC25A30 SS18 TAOK2

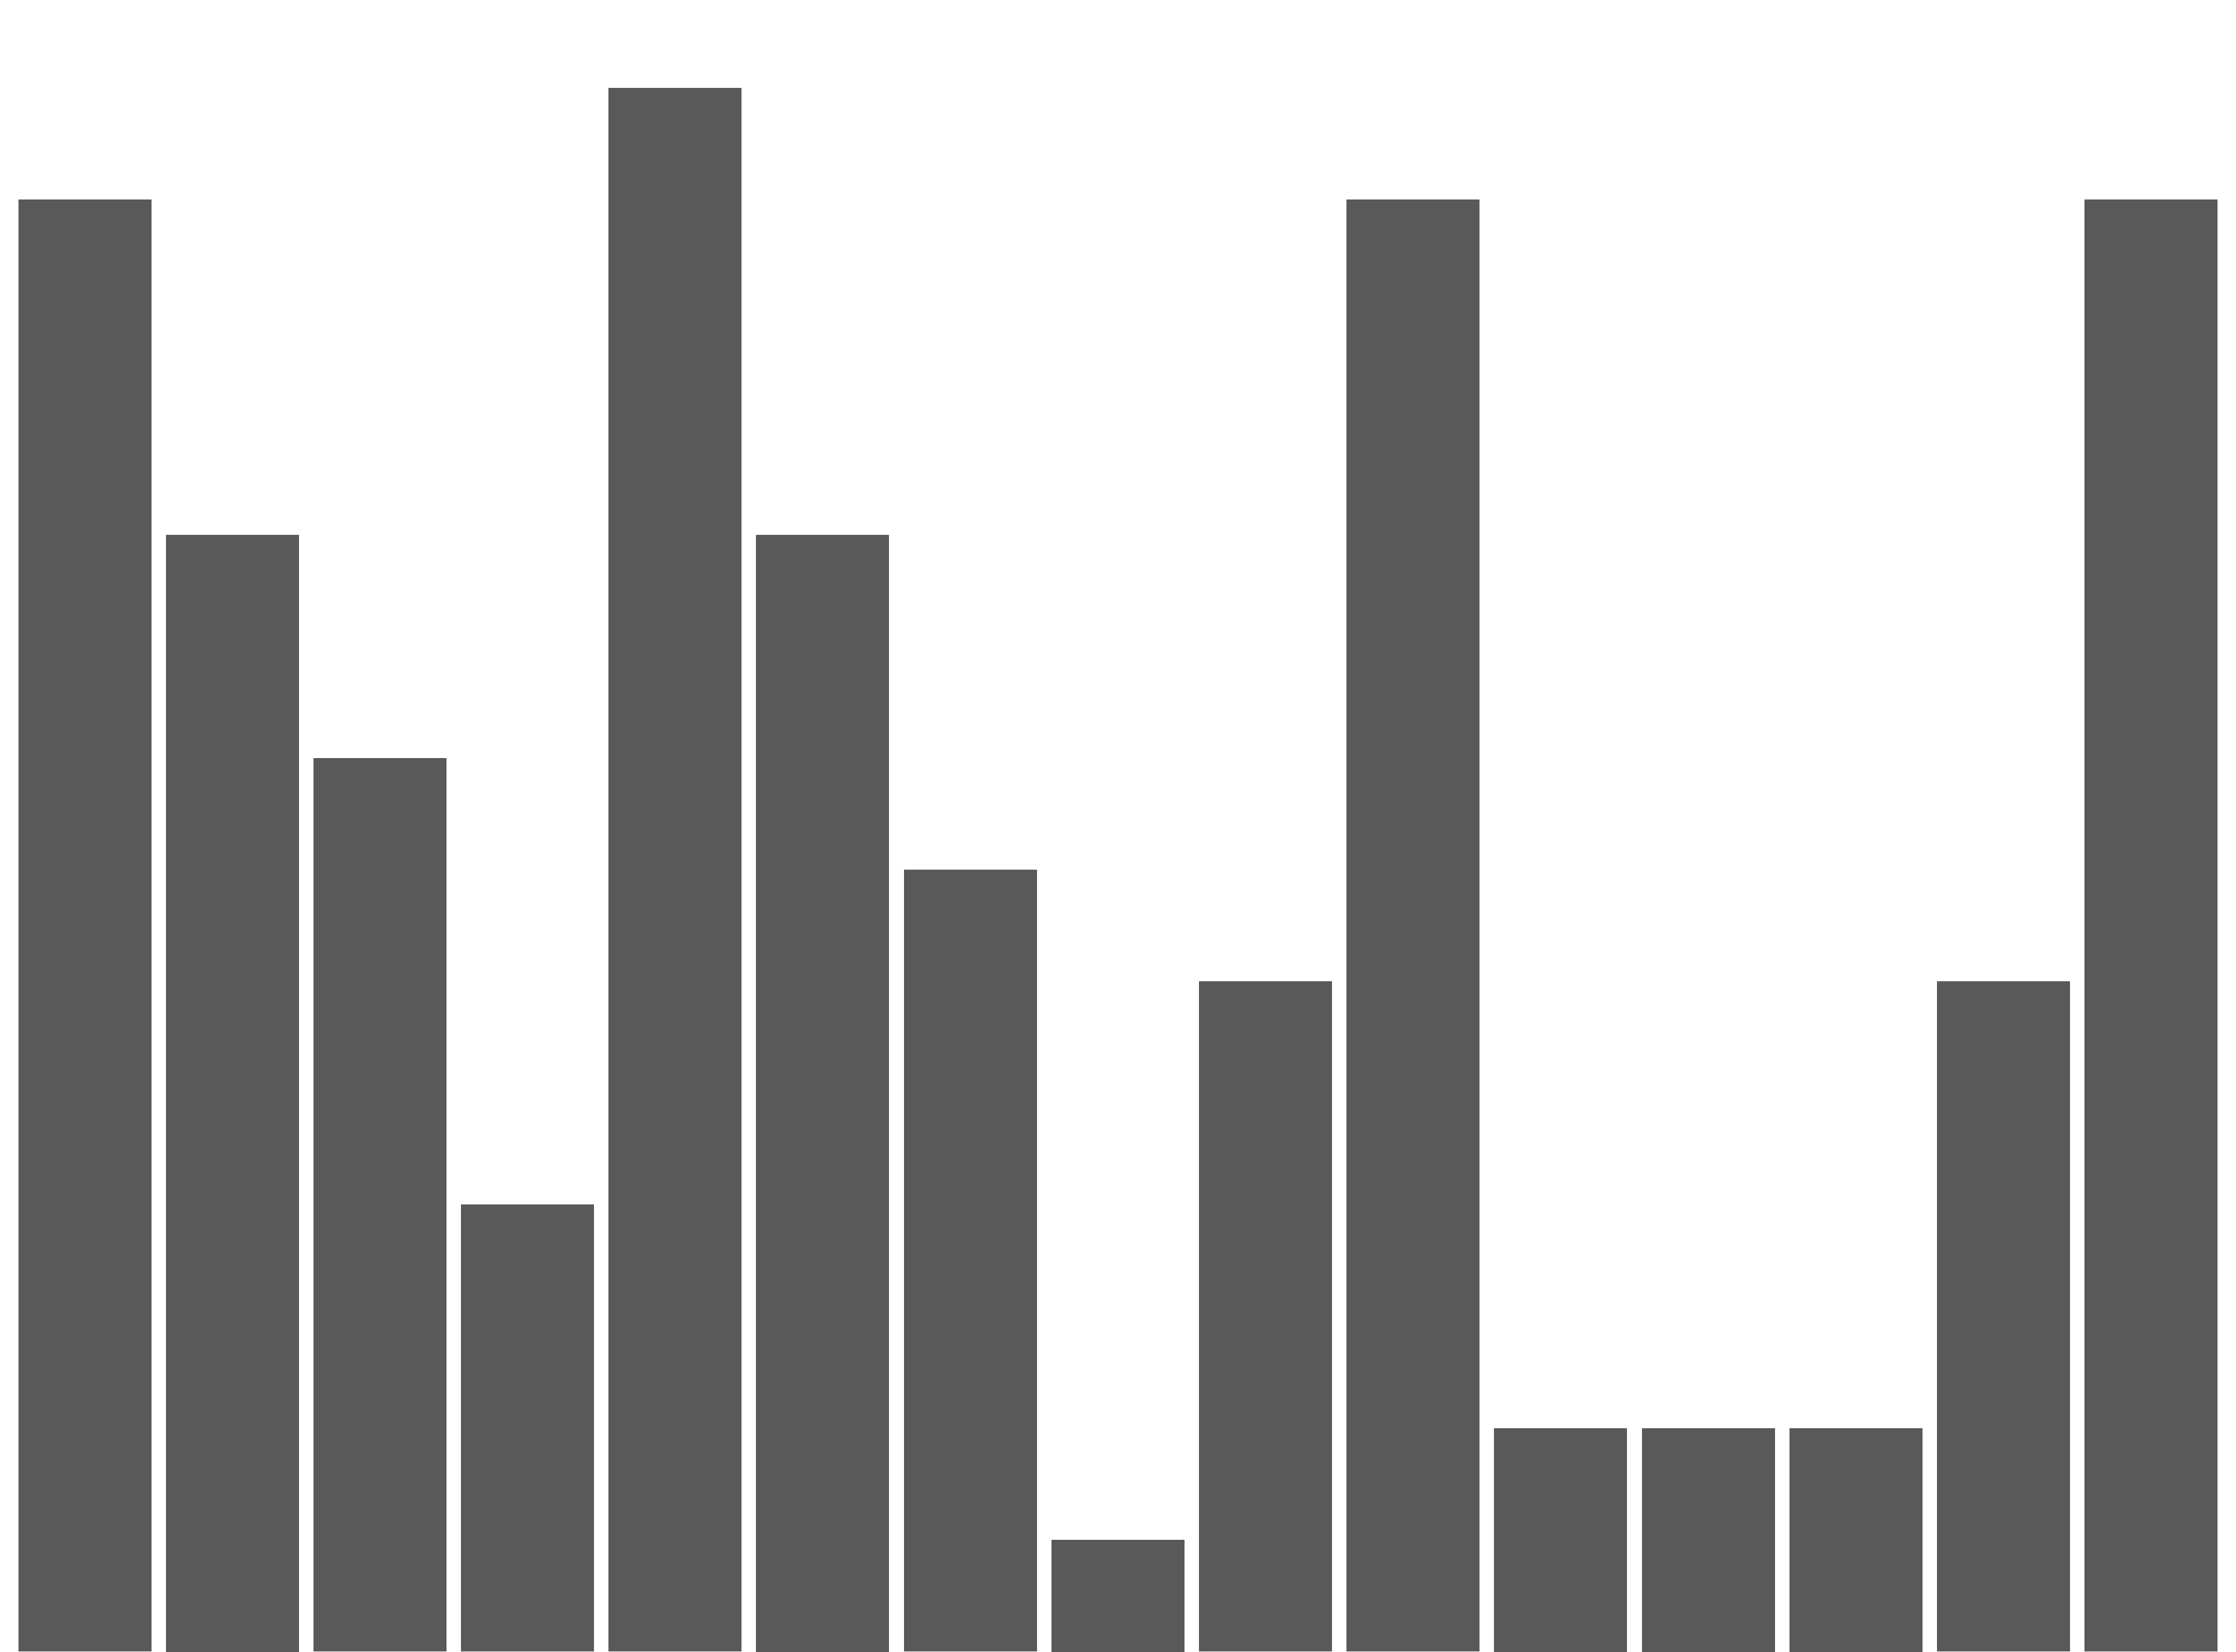

Supplement: Supplementary file [file media-6.pdf]
